# Supplementary material
Source: ML conference proceedings conference paper supplement (https://proceedings.neurips.cc/paper_files/paper/2019/hash/9d28de8ff9bb6a3fa41fddfdc28f3bc1-Abstract.html)
Supplement: Supplementary file [file 9d28de8ff9bb6a3fa41fddfdc28f3bc1-Supplemental.zip]

## 440 A Functional Encryption and crypto tools

### 441 A.1 Formal definition of Functional Encryption

442 Functional encryption relies on a pair of keys like in public key encryption: a master secret key  $\text{msk}$   
 443 and a public key  $\text{pk}$ . The public key  $\text{pk}$  can be shared and is used to encrypt the data, while the master  
 444 secret key  $\text{msk}$  is used to build functional decryption keys  $\text{dk}_f$  for  $f \in \mathcal{F}$ . A user having access to  $c$   
 445 an encryption of  $x$  with  $\text{pk}$  and to  $\text{dk}_f$  can learn  $f(x)$  but can't learn anything else about  $x$ .

446 We give the definition of Functional Encryption, originally defined in [12, 32].

447 **Definition A.1 (Functional Encryption)** A functional encryption *scheme*  $\text{FE}$  for a set of functions  
 448  $\mathcal{F} \subseteq \mathcal{X} \rightarrow \mathcal{Y}$  is a tuple of PPT algorithms  $\text{FE} = (\text{Setup}, \text{KeyGen}, \text{Enc}, \text{Dec})$  defined as follows.

449  $\text{Setup}(1^\lambda, \mathcal{F})$  takes as input a security parameter  $1^\lambda$ , the set of functions  $\mathcal{F}$ , and outputs a master  
 450 secret key  $\text{msk}$  and a public key  $\text{pk}$ .

451  $\text{KeyGen}(\text{msk}, f)$  takes as input the master secret key and a function  $f \in \mathcal{F}$ , and outputs a functional  
 452 decryption key  $\text{dk}_f$ .

453  $\text{Enc}(\text{pk}, x)$  takes as input the public key  $\text{pk}$  and a message  $x \in \mathcal{X}$ , and outputs a ciphertext  $\text{ct}$ .

454  $\text{Dec}(\text{dk}_f, \text{ct})$  takes as input a functional decryption key  $\text{dk}_f$  and a ciphertext  $\text{ct}$ , and returns an  
 455 output  $y \in \mathcal{Y} \cup \{\perp\}$ , where  $\perp$  is a special rejection symbol.

### 456 A.2 IND-CPA security

457 With notations of Appendix A.1, for any stateful adversary  $\mathcal{A}$  and any functional encryption scheme  
 458  $\text{FE}$ , we define the following advantage.

$$\text{Adv}_{\mathcal{A}}^{\text{FE}}(\lambda) := \Pr \left[ \begin{array}{l} (\text{pk}, \text{msk}) \leftarrow \text{Setup}(1^\lambda, \mathcal{F}) \\ (x_0, x_1) \leftarrow \mathcal{A}^{\text{KeyGen}(\text{msk}, \cdot)}(\text{pk}) \\ \beta \xleftarrow{\$} \{0, 1\}, \text{ct} \leftarrow \text{Enc}(\text{pk}, x_\beta) \\ \beta' \leftarrow \mathcal{A}^{\text{KeyGen}(\text{msk}, \cdot)}(\text{ct}) \end{array} \right] - \frac{1}{2},$$

459 with the restriction that all queries  $f$  that  $\mathcal{A}$  makes to key generation algorithm  $\text{KeyGen}(\text{msk}, \cdot)$  must  
 460 satisfy  $f(x_0) = f(x_1)$ .

461 We say  $\text{FE}$  is IND-CPA secure if for all PPT adversaries  $\mathcal{A}$ ,  $\text{Adv}_{\mathcal{A}}^{\text{FE}}(\lambda) = \text{negl}(\lambda)^2$ .

### 462 A.3 Bilinear Groups

463 Our  $\text{FE}$  scheme uses bilinear (or *pairing*) groups, whose use in cryptography has been introduced  
 464 by [11, 24]. More precisely, given  $\lambda$  a security parameter, let  $\mathbb{G}_1$  and  $\mathbb{G}_2$  be two cyclic groups of  
 465 prime order  $p$  (for a  $2\lambda$ -bit prime  $p$ ) and  $g_1$  and  $g_2$  their generators, respectively. The application  
 466  $e : \mathbb{G}_1 \times \mathbb{G}_2 \rightarrow \mathbb{G}_T$  is a pairing if it is efficiently computable, non-degenerated, and bilinear:  
 467  $e(g_1^\alpha, g_2^\beta) = e(g_1, g_2)^{\alpha\beta}$  for any  $\alpha, \beta \in \mathbb{Z}_p$ . Additionally, we define  $g_T := e(g_1, g_2)$  which spans the  
 468 group  $\mathbb{G}_T$  of prime order  $p$ .

469 We will denote by  $\text{GGen}$  a probabilistic polynomial-time (PPT) algorithm that on input  $1^\lambda$  returns a  
 470 description  $\mathcal{PG} = (\mathbb{G}_1, \mathbb{G}_2, p, g_1, g_2, e)$  of an asymmetric bilinear group. For convenience, given  $s =$   
 471  $1, 2$  or  $T$ ,  $n \in \mathbb{N}$  and vectors  $\vec{u} := (u_1 \dots u_n) \in \mathbb{Z}_p^n$ ,  $\vec{v} \in \mathbb{Z}_p^n$ , we denote by  $g_s^{\vec{u}} := (g_s^{u_1} \dots g_s^{u_n}) \in \mathbb{G}_s^n$   
 472 and  $e(g_1^{\vec{u}}, g_2^{\vec{v}}) = \prod_{i=1}^n e(g_1, g_2)^{u_i \cdot v_i} = e(g_1, g_2)^{\vec{u} \cdot \vec{v}} \in \mathbb{G}_T$ , where  $\vec{u} \cdot \vec{v}$  is the inner product, i.e.  
 473  $\vec{u} \cdot \vec{v} := \sum_{i=1}^n u_i v_i$ .

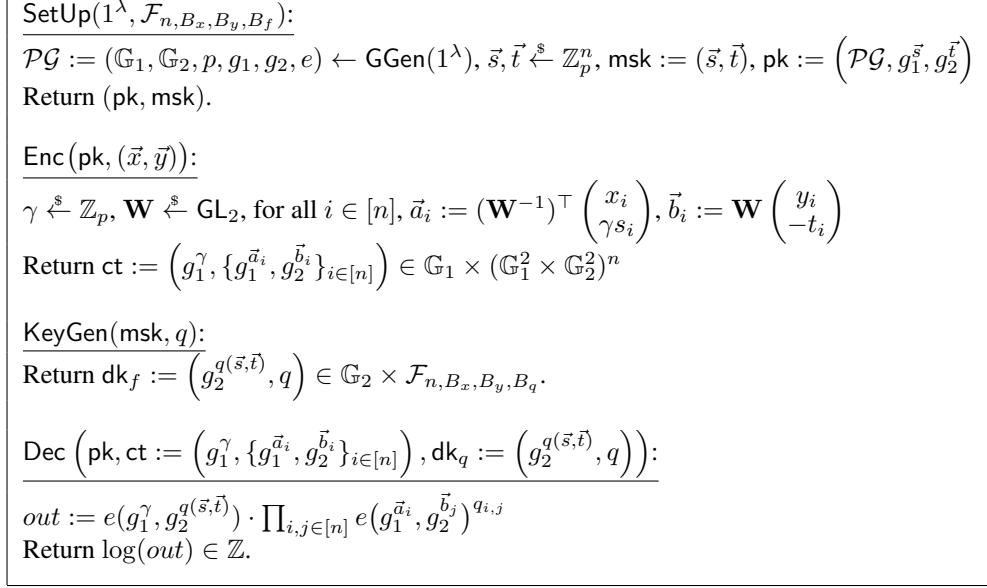

Figure 10: Our functional encryption scheme for quadratic polynomials.

## 474 B Our Quadratic Functional Encryption Scheme

### 475 B.1 Proofs of IND-CPA security and correctness

#### 476 Proof of Security

477 To prove security of our scheme, we use the Generic Bilinear Group Model, which captures the  
 478 fact that no attacks can make use of the representation of group elements. For convenience, we use  
 479 Maurer's model [30], where a third party implements the group and gives access to the adversary via  
 480 handles, providing also equality checking. This is an alternative, but equivalent, formulation of the  
 481 Generic Group Model, as originally introduced in [31, 37].

482 We prove security in two steps: first, we use a master theorem from [6] that relates the security in the  
 483 Generic Bilinear Group model to a security in a symbolic model. Second, we prove security in the  
 484 symbolic model. Let us now explain the symbolic model (the next paragraph is taken verbatim from  
 485 [4]).

486 In the symbolic model, the third party does not implement an actual group, but keeps track of abstract  
 487 expressions. For example, consider an experiment where values  $x, y$  are sampled from  $\mathbb{Z}_p$  and the  
 488 adversary gets handles to  $g^x$  and  $g^y$ . In the generic model, the third party will choose a group of order  
 489  $p$ , for example  $(\mathbb{Z}_p, +)$ , will sample values  $x, y \leftarrow_R \mathbb{Z}_p$  and will give handles to  $x$  and  $y$ . On the  
 490 other hand, in the symbolic model the sampling won't be performed and the third party will output  
 491 handles to  $X$  and  $Y$ , where  $X$  and  $Y$  are abstract variables. Now, if the adversary asks for equality  
 492 of the elements associated to the two handles, the answer will be negative in the symbolic model,  
 493 since abstract variable  $X$  is different from abstract variable  $Y$ , but there is a small chance the equality  
 494 check succeeds in the generic model (only when the sampling of  $x$  and  $y$  coincides).

495 To apply the master theorem, we first need to change the distribution of the security game to  
 496 ensure that the public key, challenge ciphertext, and functional decryption keys only contain group  
 497 elements whose exponent is a polynomial evaluated on uniformly random values in  $\mathbb{Z}_p$  (this is called  
 498 polynomially induced distributions in [6, Definition 10], and previously in [10]). We show that this is  
 499 possible with only a negligible statistical change in the distribution of the adversary view.

<sup>2</sup>In cryptography, the security parameter  $\lambda$  is a measure of the probability with which an adversary can break the scheme.  $\lambda$  or  $1^\lambda$  means that the probability of breaking the scheme is  $2^{-\lambda}$ .

After applying the master theorem from [6], we prove the security in the symbolic model (cf. Appendix D.1), which simply consists of checking that an algebraic condition on the scheme is satisfied.

**Theorem B.1 (IND-CPA Security in the Generic Bilinear Group Model)** *For any PPT adversary  $\mathcal{A}$  that performs at most  $Q$  group operations against the functional encryption scheme described on 10, we have, in the generic bilinear group model:*

$$\text{Adv}_{\mathcal{A}}^{\text{FE}}(\lambda) \leq \frac{12 \cdot (6n + 3 + Q + Q')^2 + 1}{p},$$

where  $Q'$  is the number of queries to  $\text{KeyGen}(\text{msk}, \cdot)$ .

The proof of this result is quite technical and can be found in the dedicated Appendix D.

### Proof of Correctness

For all  $i, j \in [n]$ , we have:

$$e(g_1^{\vec{a}_i}, g_2^{\vec{b}_j}) = g_T^{\vec{a}_i \cdot \vec{b}_j} = g_T^{x_i y_j - \gamma s_i t_j}$$

since

$$\begin{aligned} \vec{a}_i \cdot \vec{b}_j &= \left( (\mathbf{W}^{-1})^\top \begin{pmatrix} x_i \\ \gamma s_i \end{pmatrix} \right)^\top \cdot \left( \mathbf{W} \begin{pmatrix} y_j \\ -t_j \end{pmatrix} \right) \\ &= \begin{pmatrix} x_i \\ \gamma s_i \end{pmatrix}^\top \mathbf{W}^{-1} \mathbf{W} \begin{pmatrix} y_j \\ -t_j \end{pmatrix} = x_i y_j - \gamma s_i t_j. \end{aligned}$$

Therefore we have:

$$\begin{aligned} \text{out} &= e(g_1^\gamma, g_2^{q(\vec{s}, \vec{t})}) \cdot \prod_{i,j} e(g_1^{\vec{a}_i}, g_2^{\vec{b}_j})^{q_{i,j}} = g_T^{\gamma q(\vec{s}, \vec{t})} \cdot g_T^{\sum_{i,j} q_{i,j} x_i y_j - \gamma q_{i,j} s_i t_j} \\ &= g_T^{\gamma q(\vec{s}, \vec{t})} \cdot g_T^{q(\vec{x}, \vec{y}) - \gamma q(\vec{s}, \vec{t})} = g_T^{q(\vec{x}, \vec{y})}. \end{aligned}$$

### Proof of Complexity

The complexity can be inferred from the decryption phase as detailed in Figure 10 and we compare this with previous quadratic FE schemes in Figure 11.

| FE scheme   | $ct$                                             | $dk_f$                             | Dec                  | Assumption  |
|-------------|--------------------------------------------------|------------------------------------|----------------------|-------------|
| [6, Sec. 3] | $\mathbb{G}_1^{6n+1} \times \mathbb{G}_2^{6n+1}$ | $\mathbb{G}_1 \times \mathbb{G}_2$ | $6n^2(E_1 + P) + 2P$ | SXDH, 3PDDH |
| [6, Sec. 4] | $\mathbb{G}_1^{2n+1} \times \mathbb{G}_2^{2n+1}$ | $\mathbb{G}_1^2$                   | $3n^2(E_1 + P) + 2P$ | GGM         |
| Ours        | $\mathbb{G}_1^{2n+1} \times \mathbb{G}_2^{2n}$   | $\mathbb{G}_2$                     | $2n^2(E_1 + P) + P$  | GGM         |

Figure 11: Performance comparison of FE for quadratic polynomials.  $E_1$  and  $P$  denote exponentiation in  $\mathbb{G}_1$  and pairing evaluation, respectively. Decryption additionally requires solving a discrete logarithm but this computational overhead is the same for all schemes and is therefore omitted here.

## B.2 Detailed equivalence of the FE scheme with a neural network

### Proof of Linear Homomorphism

For all  $(\vec{x}, \vec{y}) \in \mathbb{Z}_p^n \times \mathbb{Z}_p^n$ , and  $(\vec{u}, \vec{v}) \in \mathbb{Z}_p^n \times \mathbb{Z}_p^n$ , given an encryption of  $(\vec{x}, \vec{y})$  under the public key  $\text{pk} := (g_1^{\vec{s}}, g_2^{\vec{t}})$ , one can efficiently compute an encryption of  $(\vec{u}^\top \vec{x}, \vec{v}^\top \vec{y})$  under the public key  $\text{pk}' := (g_1^{\vec{u}^\top \vec{s}}, g_2^{\vec{v}^\top \vec{t}})$ . Indeed, given

$$\text{Enc}(\text{pk}, (\vec{x}, \vec{y})) := (g_1^\gamma, \{g_1^{\vec{a}_i}, g_2^{\vec{b}_i}\}_{i \in [n]}),$$

and  $\vec{u}, \vec{v} \in \mathbb{Z}_p^n$ , one can efficiently compute:

$$(g_1^\gamma, g_1^{\sum_{i \in [n]} u_i \cdot \vec{a}_i}, g_2^{\sum_{i \in [n]} v_i \cdot \vec{b}_i}),$$

520 which is  $\text{Enc}(\text{pk}', (\vec{u}^\top \vec{x}, \vec{v}^\top \vec{y}))$ , since:

$$\begin{aligned} \sum_{i \in [n]} u_i \cdot \vec{a}_i &= \sum_{i \in [n]} u_i \cdot (\mathbf{W}^{-1})^\top \begin{pmatrix} x_i \\ \gamma s_i \end{pmatrix} = (\mathbf{W}^{-1})^\top \begin{pmatrix} \sum_{i \in [n]} u_i \cdot x_i \\ \gamma \sum_{i \in [n]} u_i \cdot s_i \end{pmatrix} \\ &= (\mathbf{W}^{-1})^\top \begin{pmatrix} \vec{u}^\top \vec{x} \\ \gamma \vec{u}^\top \vec{s} \end{pmatrix}. \end{aligned}$$

521 Similarly, we have:

$$\sum_{i \in [n]} v_i \cdot \vec{b}_i = \sum_{i \in [n]} v_i \cdot \mathbf{W} \begin{pmatrix} y_i \\ -t_i \end{pmatrix} = \mathbf{W} \begin{pmatrix} \vec{v}^\top \vec{y} \\ -\vec{v}^\top \vec{t} \end{pmatrix}.$$

## 522 C Additional results

### 523 C.1 Influence of weight compression on the network performance

524 We show here that we can manage to compress significantly the network weights in order to have  
 525 a very fast discrete logarithm without modifying the results and conclusions made throughout the  
 526 article. The main and collateral model follow the same CNN structure as stated above, and the  
 527 collateral accuracy is reported after 10 epochs of training.

|                                      |                     |
|--------------------------------------|---------------------|
| Main accuracy with compression       | $97.72 \pm 0.30 \%$ |
| Collateral accuracy with compression | $55.27 \pm 0.41 \%$ |

Table 2: Impact of weight compression on the main and collateral accuracies

### 528 C.2 Influence of alpha during adversarial training

529 To choose the best value for  $\alpha$ , we have chosen an output size of 4 which allows us to keep a very  
 530 high main accuracy while reducing significantly the collateral one, as shown in Figure 4. We observe  
 531 that the semi-adversarial training does not affect much the main accuracy for a large range of values  
 532 for  $\alpha$ , while its impact on the collateral accuracy is decisive. Figure 12 illustrates the role of  $\alpha$  and  
 533 justify our choice of  $\alpha = 1.7$ . For this experiment, we have chosen for both networks a simple feed  
 534 forward with a hidden layer of 32 neurons.

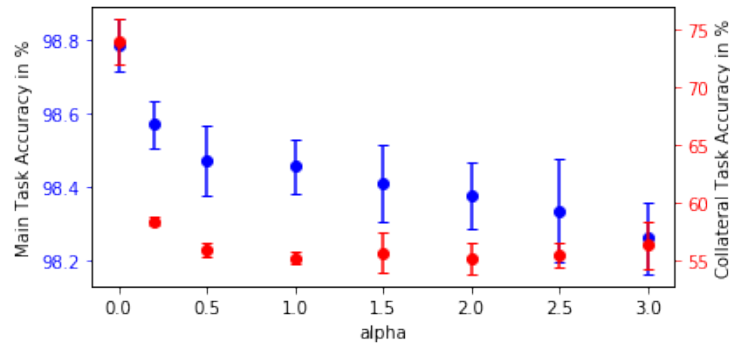

Figure 12: Trade-off between the main and collateral tasks accuracies as a function of  $\alpha$

## 535 D Security proof of our FE scheme

536 *Proof.* For any experiment  $\text{Exp}$ , adversary  $\mathcal{A}$ , and security parameter  $\lambda \in \mathbb{N}$ , we use the notation:  
 537  $\text{Adv}_{\text{Exp}}(\mathcal{A}) := \Pr[1 \leftarrow \text{Exp}(1^\lambda, \mathcal{A})]$ , where the probability is taken over the random coins of  $\text{Exp}$   
 538 and  $\mathcal{A}$ .

|                                                                                                                                                                                                                                                                                                                                                                                                                                                                                                                                                                                                                                                                                                                                                                                                                                                                                                                                                                                                                                                                                                                                                                                                           |                                                                              |
|-----------------------------------------------------------------------------------------------------------------------------------------------------------------------------------------------------------------------------------------------------------------------------------------------------------------------------------------------------------------------------------------------------------------------------------------------------------------------------------------------------------------------------------------------------------------------------------------------------------------------------------------------------------------------------------------------------------------------------------------------------------------------------------------------------------------------------------------------------------------------------------------------------------------------------------------------------------------------------------------------------------------------------------------------------------------------------------------------------------------------------------------------------------------------------------------------------------|------------------------------------------------------------------------------|
| $\text{Exp}_1(1^\lambda, \mathcal{A}):$<br>$(\mathbb{G}_1, \mathbb{G}_2, p, g_1, g_2, e) \leftarrow \text{GGen}(1^\lambda), \vec{s}, \vec{t} \xleftarrow{\$} \mathbb{Z}_p^n$<br>$a, b, c, d \xleftarrow{\$} \mathbb{Z}_p, \text{set } \mathcal{PG} := (\mathbb{G}_1, \mathbb{G}_2, p, g_1^{ad-bc}, g_2, e)$<br>$\text{msk} := (\vec{s}, \vec{t}), \text{pk} := (\mathcal{PG}, g_1^{(ad-bc)\vec{s}}, g_2^{\vec{t}})$<br>$((\vec{x}^{(0)}, \vec{y}^{(0)}), (\vec{x}^{(1)}, \vec{y}^{(1)})) \leftarrow \mathcal{A}^{\text{KeyGen}(\text{msk}, \cdot)}(\text{pk})$<br>$\beta \xleftarrow{\$} \{0, 1\}, \gamma \xleftarrow{\$} \mathbb{Z}_p$<br>for all $i \in [n], \vec{a}_i := \begin{pmatrix} d & -c \\ -b & a \end{pmatrix} \begin{pmatrix} x_i^{(\beta)} \\ \gamma s_i \end{pmatrix}, \vec{b}_i := \begin{pmatrix} a & b \\ c & d \end{pmatrix} \begin{pmatrix} y_i^{(\beta)} \\ -t_j \end{pmatrix}$<br>$ct := (g_1^{\gamma(ad-bc)}, \{g_1^{\vec{a}_i}, g_2^{\vec{b}_i}\}_{i \in [n]})$<br>$\beta' \leftarrow \mathcal{A}^{\text{KeyGen}(\text{msk}, \cdot)}(\text{pk}, ct)$<br>Return 1 if $\beta' = \beta$ and for all queried $f, f(\vec{x}^{(0)}, \vec{y}^{(0)}) = f(\vec{x}^{(1)}, \vec{y}^{(1)})$ . | $\text{KeyGen}(\text{msk}, f):$<br>return $(g_2^{f(\vec{s}, \vec{t})}, f)$ . |
|-----------------------------------------------------------------------------------------------------------------------------------------------------------------------------------------------------------------------------------------------------------------------------------------------------------------------------------------------------------------------------------------------------------------------------------------------------------------------------------------------------------------------------------------------------------------------------------------------------------------------------------------------------------------------------------------------------------------------------------------------------------------------------------------------------------------------------------------------------------------------------------------------------------------------------------------------------------------------------------------------------------------------------------------------------------------------------------------------------------------------------------------------------------------------------------------------------------|------------------------------------------------------------------------------|

Figure 13: Experiment  $\text{Exp}_1$ , for the proof of Theorem B.1.

While we want to prove the security result in the real experiment  $\text{Exp}_0$ , in which the adversary has to guess  $\beta$ , we slightly modify it into the hybrid experiment  $\text{Exp}_1$ , described in 13: we write the matrix  $\mathbf{W} \xleftarrow{\$} \text{GL}_2$  used in the challenge ciphertext as  $\mathbf{W} := \begin{pmatrix} a & b \\ c & d \end{pmatrix}$ , chosen from the beginning. Then  $\mathbf{W}^{-1} = \frac{1}{ad-bc} \begin{pmatrix} d & -b \\ -c & a \end{pmatrix}$ . The only difference with the IND-CPA security game as defined in Appendix A.2, is that we change the generator  $g_1 \xleftarrow{\$} \mathbb{G}_1^*$  into  $g_1^{ad-bc}$  for  $a, b, c, d \xleftarrow{\$} \mathbb{Z}_p$ , which only changes the distribution of the game by a statistical distance of at most  $\frac{3}{p}$  (this is obtained by computing the probability that  $ad - bc = 0$  when  $a, b, c, d \xleftarrow{\$} \mathbb{Z}_p$ ). Thus,

$$\text{Adv}_{\mathcal{A}}^{\text{FE}}(\lambda) = \text{Adv}_0(\mathcal{A}) \leq \text{Adv}_1(\mathcal{A}) + \frac{3}{p}.$$

Note that in  $\text{Exp}_1$ , the public key, the challenge ciphertext and the functional decryption keys only contain group elements whose exponents are polynomials evaluated on random inputs (as opposed to  $g_1^{\mathbf{W}^{-1}}$ , for instance). This is going to be helpful for the next step of the proof, which uses the generic bilinear group model. Next, we make the generic bilinear group model assumption, which intuitively says that no PPT adversary can exploit the structure of the bilinear group to perform better attacks than generic adversaries. That is, we have (with  $\text{Exp}_2$  defined in 14):

$$\max_{\text{PPT } \mathcal{A}} (\text{Adv}_1(\mathcal{A})) = \max_{\text{PPT } \mathcal{A}} (\text{Adv}_2(\mathcal{A})).$$

In this experiment, we denote by  $\emptyset$  the empty list, by  $\text{append}(L, x)$  the addition of an element  $x$  to the list  $L$ , and for any  $i \in \mathbb{N}$ , we denote by  $L[i]$  the  $i$ 'th element of the list  $L$  if it exists (lists are indexed from index 1 on), or  $\perp$  otherwise.

Thus, it suffices to show that for any PPT adversary  $\mathcal{A}$ ,  $\text{Adv}_2(\mathcal{A})$  is negligible in  $\lambda$ . The experiment  $\text{Exp}_2$  defined in Figure 14 falls into the general class of simple interactive decisional problems from [6, Definition 14]. Thus, we can use their master theorem [6, Theorem 7], which, for our particular case (setting the public key size  $N := 2n + 2$ , the key size  $c = 1$ , the ciphertext size  $c^* := 4n + 1$ , and degree  $d = 6$  in [6, Theorem 7]) states that:

$$\text{Adv}_2(\mathcal{A}) \leq \frac{12 \cdot (6n + 3 + Q + Q')^2}{p},$$

Exp<sub>2</sub>(1<sup>λ</sup>, A):  
 $L_1 = L_2 = L_T := \emptyset, Q_{\text{sk}} := \emptyset, \vec{s}, \vec{t} \xleftarrow{\$} \mathbb{Z}_p^n, a, b, c, d \xleftarrow{\$} \mathbb{Z}_p, \text{append}(L_1, (ad - bc) \cdot \vec{s}),$   
 $\text{append}(L_2, \vec{t}), \beta \xleftarrow{\$} \{0, 1\}$   
 $((\vec{x}^{(0)}, \vec{y}^{(0)}), (\vec{x}^{(1)}, \vec{y}^{(1)})) \leftarrow \mathcal{A}^{\mathcal{O}_{\text{add}}, \mathcal{O}_{\text{pair}}, \mathcal{O}_{\text{sk}}, \mathcal{O}_{\text{eq}}}(1^\lambda, p)$   
 $\mathcal{O}_{\text{chal}}((\vec{x}^{(0)}, \vec{y}^{(0)}), (\vec{x}^{(1)}, \vec{y}^{(1)}))$   
 $\beta' \leftarrow \mathcal{A}^{\mathcal{O}_{\text{add}}, \mathcal{O}_{\text{pair}}, \mathcal{O}_{\text{sk}}, \mathcal{O}_{\text{eq}}}(1^\lambda, p)$   
 If  $\beta = \beta'$ , and for all  $f \in Q_{\text{sk}}, f(\vec{x}^{(0)}, \vec{y}^{(0)}) = f(\vec{x}^{(1)}, \vec{y}^{(1)})$ , output 1. Otherwise, output 0.

$\mathcal{O}_{\text{add}}(s \in \{1, 2, T\}, i, j \in \mathbb{N})$ :  
 $\text{append}(L_s, L_s[i] + L_s[j]).$

$\mathcal{O}_{\text{pair}}(i, j \in \mathbb{N})$ :  
 $\text{append}(L_T, L_1[i] \cdot L_2[j]).$

$\mathcal{O}_{\text{chal}}((\vec{x}^{(0)}, \vec{y}^{(0)}), (\vec{x}^{(1)}, \vec{y}^{(1)}))$ :  
 $\gamma \xleftarrow{\$} \mathbb{Z}_p, \text{append}(L_1, \gamma(ad - bc))$   
 for all  $i \in [n], \vec{a}_i := \begin{pmatrix} d & -c \\ -b & a \end{pmatrix} \begin{pmatrix} x_i^{(\beta)} \\ \gamma s_i \end{pmatrix}, \text{append}(L_1, \vec{a}_i), \vec{b}_i := \begin{pmatrix} a & b \\ c & d \end{pmatrix} \begin{pmatrix} y_i^{(\beta)} \\ -t_i \end{pmatrix},$   
 $\text{append}(L_2, \vec{b}_i).$

$\mathcal{O}_{\text{sk}}(f \in \mathcal{F}_{n, B_x, B_y, B_f})$ :  
 $\text{append}(L_2, f(\vec{s}, \vec{t})), Q_{\text{sk}} := Q_{\text{sk}} \cup \{f\}.$

$\mathcal{O}_{\text{eq}}(s \in \{1, 2, T\}, i, j \in \mathbb{N})$ :  
 Output 1 if  $L_s[i] = L_s[j]$ , 0 otherwise

Figure 14: Experiment Exp<sub>2</sub>. Wlog. we assume no query contains indices  $i, j \in \mathbb{N}$  that exceed the size of the involved lists.

562 where  $Q'$  is the number of queries to  $\mathcal{O}_{\text{sk}}$ , and  $Q$  is the number of group operations, that is, the  
 563 number of calls to oracles  $\mathcal{O}_{\text{add}}$  and  $\mathcal{O}_{\text{pair}}$ , provided the following algebraic condition is satisfied:

$$\begin{aligned} & \{\mathbf{M} \in \mathbb{Z}_p^{(3n+2) \times (3n+Q'+1)} : \text{Eq}_0(\mathbf{M})\} \\ &= \{\mathbf{M} \in \mathbb{Z}_p^{(3n+2) \times (3n+Q'+1)} : \text{Eq}_1(\mathbf{M})\}, \end{aligned}$$

564 where for all  $\mathbf{M}, b \in \{0, 1\}$ ,

$$\text{Eq}_b(\mathbf{M}) : \begin{pmatrix} 1 \\ (AD - BC)\vec{S} \\ (AD - BC)\Gamma \\ D\vec{x}^{(b)} - \Gamma C\vec{S} \\ -B\vec{x}^{(b)} + \Gamma A\vec{S} \end{pmatrix}^\top \mathbf{M} \begin{pmatrix} 1 \\ \vec{T} \\ A\vec{y}^{(b)} - B\vec{T} \\ C\vec{y}^{(b)} - D\vec{T} \\ (f(\vec{S}, \vec{T}))_{f \in Q_{\text{sk}}} \end{pmatrix} = 0,$$

565 where the equality is taken in the ring  $\mathbb{Z}_p[\vec{S}, \vec{T}, A, B, C, D, \Gamma]$ , and 0 denotes the zero polynomial.  
 566 Intuitively, this condition captures the security at a symbolic level: it holds for schemes that are not  
 567 trivially broken. The latter means that computing a linear combination in the exponents of target  
 568 group elements that can be obtained from pk, the challenge ciphertext, and functional decryption  
 569 keys, does not break the security of the scheme. We prove this condition is satisfied in D.1 below.  $\square$

570 **Lemma D.1 (Symbolic Security)** For any  $(\vec{x}^{(0)}, \vec{y}^{(0)}), (\vec{x}^{(1)}, \vec{y}^{(1)}) \in Z_p^{2n}$ , and any set  $Q_{\text{sk}} \subseteq$   
 571  $\mathcal{F}_{n, B_x, B_y, B_f}$  such that for all  $f \in Q_{\text{sk}}$ ,  $f(\vec{x}^{(0)}, \vec{y}^{(0)}) = f(\vec{x}^{(1)}, \vec{y}^{(1)})$ , we have:

$$\begin{aligned} & \{\mathbf{M} \in \mathbb{Z}_p^{(3n+2) \times (3n+Q'+1)} : \text{Eq}_0(\mathbf{M})\} \\ &= \{\mathbf{M} \in \mathbb{Z}_p^{(3n+2) \times (3n+Q'+1)} : \text{Eq}_1(\mathbf{M})\}, \end{aligned}$$

572 where for all  $\mathbf{M}$ ,  $b \in \{0, 1\}$ ,

$$\text{Eq}_b(\mathbf{M}) : \begin{pmatrix} 1 \\ (AD - BC)\vec{S} \\ (AD - BC)\Gamma \\ D\vec{x}^{(b)} - \Gamma C\vec{S} \\ -B\vec{x}^{(b)} + \Gamma A\vec{S} \end{pmatrix}^\top \mathbf{M} \begin{pmatrix} 1 \\ \vec{T} \\ A\vec{y}^{(b)} - B\vec{T} \\ C\vec{y}^{(b)} - D\vec{T} \\ (f(\vec{S}, \vec{T}))_{f \in Q_{\text{sk}}} \end{pmatrix} = 0,$$

573 where the equality is taken in the ring  $\mathbb{Z}_p[\vec{S}, \vec{T}, A, B, C, D, \Gamma]$ , and 0 denotes the zero polynomial.

574 *Proof.* Let  $b \in \{0, 1\}$ , and  $\mathbf{M} \in \mathbb{Z}_p^{(3n+2) \times (3n+Q'+1)}$  that satisfies  $\text{Eq}_b(\mathbf{M})$ . We prove it also satisfies  
 575  $\text{Eq}_{1-b}(\mathbf{M})$ . To do so, we use the following rules:

576 **Rule 1** : for all  $P, Q, R \in \mathbb{Z}_p[\vec{S}, \vec{T}, A, B, C, D, \Gamma]$ , with  $\deg(P) \geq 1$ , if  $P \cdot Q + R = 0$  and  $R$  is  
 577 not a multiple of  $P$ , then  $Q = 0$  and  $R = 0$ .

578 **Rule 2** : for all  $P \in \mathbb{Z}_p[\vec{S}, \vec{T}, A, B, C, D, \Gamma]$ , any variable  $X$  among the set  $\{\vec{S}, \vec{T}, A, B, C, D, \Gamma\}$ ,  
 579 and any  $x \in \mathbb{Z}_p$ ,  $P = 0$  implies  $P(X := x) = 0$ , where  $P(X := x)$  denotes the polynomial  
 580  $P$  evaluated on  $X = x$ .

581 Evaluating  $\text{Eq}_b(\mathbf{M})$  on  $B = D = 0$  (using **Rule 2**), then using **Rule 1** on  $P = CT S_i T_j$  for all  
 582  $i, j \in [n]$ , we obtain that:

$$\mathbf{M}_{n+2+i} \begin{pmatrix} 0 \\ \vec{T} \\ \mathbf{0} \\ \mathbf{0} \\ (f(\vec{S}, \vec{T}))_{f \in Q_{\text{sk}}} \end{pmatrix} = 0,$$

583 where  $\mathbf{M}_{n+2+i}$  denotes the  $n+2+i$ 'th row of  $\mathbf{M}$ .

584 Similarly, using **Rule 1** on  $P = \Gamma A S_i T_j$  for all  $i, j \in [n]$ , we obtain that:

$$\mathbf{M}_{2n+2+i} \begin{pmatrix} 0 \\ \vec{T} \\ \mathbf{0} \\ \mathbf{0} \\ (f(\vec{S}, \vec{T}))_{f \in Q_{\text{sk}}} \end{pmatrix} = 0.$$

585 Thus, we have:

$$\forall \beta \in \{0, 1\} : \begin{pmatrix} 0 \\ \mathbf{0} \\ 0 \\ D\vec{x}^{(\beta)} - \Gamma C\vec{S} \\ -B\vec{x}^{(\beta)} + \Gamma A\vec{S} \end{pmatrix}^\top \mathbf{M} \begin{pmatrix} 0 \\ \vec{T} \\ \mathbf{0} \\ \mathbf{0} \\ (f(\vec{S}, \vec{T}))_{f \in Q_{\text{sk}}} \end{pmatrix} = 0. \quad (1)$$

586 Using **Rule 1** on  $P = (AD - BC)S_i B T_j$  for all  $i, j \in [n]$  in the equation  $\text{Eq}_b(\mathbf{M})$ , we get that the  
 587 coefficient  $M_{i+1, n+1+j} = 0$  for all  $i, j \in [n]$ . Similarly, using **Rule 1** on  $P = (AD - BC)S_i D T_j$   
 588 for all  $i, j \in [n]$ , we get  $M_{i+1, 2n+1+j} = 0$  for all  $i, j \in [n]$ . Then, using **Rule 1** on  $P =$   
 589  $(AD - BC)\Gamma B T_j$  for all  $j \in [n]$ , we get  $M_{n+2, n+1+j} = 0$  for all  $j \in [n]$ . Finally, using **Rule 1** on  
 590  $P = (AD - BC)\Gamma D T_j$  for all  $j \in [n]$ , we get  $M_{n+2, 2n+1+j} = 0$  for all  $j \in [n]$ . Overall, we obtain:

$$\forall \beta \in \{0, 1\} : \begin{pmatrix} 0 \\ (AD - BC)\vec{S} \\ (AD - BC)\Gamma \\ \mathbf{0} \\ \mathbf{0} \end{pmatrix}^\top \mathbf{M} \begin{pmatrix} 0 \\ \vec{T} \\ A\vec{y}^{(\beta)} - B\vec{T} \\ C\vec{y}^{(\beta)} - D\vec{T} \\ \mathbf{0} \end{pmatrix} = 0. \quad (2)$$

591 We write:

$$\begin{aligned}
& \begin{pmatrix} 0 \\ \mathbf{0} \\ 0 \\ D\vec{x}^{(b)} - \Gamma C\vec{S} \\ -B\vec{x}^{(b)} + \Gamma A\vec{S} \end{pmatrix}^\top \mathbf{M} \begin{pmatrix} 0 \\ \mathbf{0} \\ A\vec{y}^{(b)} - B\vec{T} \\ C\vec{y}^{(b)} - D\vec{T} \\ \mathbf{0} \end{pmatrix} \\
&= \sum_{i,j \in [n]} \begin{pmatrix} Dx_i^{(b)} - \Gamma C S_i \\ -Bx_i^{(b)} + \Gamma A S_i \end{pmatrix}^\top \\
&\times \left( m_{i,j}^{(1)} \begin{pmatrix} 1 & 0 \\ 0 & 1 \end{pmatrix} + m_{i,j}^{(2)} \begin{pmatrix} 1 & 0 \\ 0 & 0 \end{pmatrix} + m_{i,j}^{(3)} \begin{pmatrix} 0 & 0 \\ 1 & 0 \end{pmatrix} + m_{i,j}^{(4)} \begin{pmatrix} 0 & 1 \\ 0 & 0 \end{pmatrix} \right) \\
&\times \begin{pmatrix} Ay_j^{(b)} - BT_j \\ Cy_j^{(b)} - DT_j \end{pmatrix}
\end{aligned}$$

Evaluating the equation  $\text{Eq}_b(\mathbf{M})$  on  $C = D = 0$  (by **Rule 2**), then using **Rule 1** on  $P = \Gamma ABS_i T_j$  for all  $i, j \in [n]$ , we obtain  $m_{i,j}^{(3)} = 0$  for all  $i, j \in [n]$ . Evaluating the equation  $\text{Eq}_b(\mathbf{M})$  on  $A = B = 0$  (by **Rule 2**), then using **Rule 1** on  $P = \Gamma CDS_i T_j$  for all  $i, j \in [n]$ , we obtain  $m_{i,j}^{(4)} = 0$  for all  $i, j \in [n]$ . Evaluating the equation  $\text{Eq}_b(\mathbf{M})$  on  $A = B = C = D = 1$  (using **Rule 2**), then using **Rule 1** on  $P = \Gamma S_i T_j$  for all  $i, j \in [n]$ , using the fact that  $m_{i,j}^{(3)} = m_{i,j}^{(4)} = 0$  and (1), we obtain  $m_{i,j}^{(2)} = 0$  for all  $i, j \in [n]$ . Using **Rule 1** on  $P = \Gamma(AD - BC)S_i T_j$  for all  $i, j \in [n]$  in the equation  $\text{Eq}_b(\mathbf{M})$ , we obtain that for all  $i, j \in [n]$ ,

$$m_{i,j}^{(1)} = \mathbf{M}_{n+2} \begin{pmatrix} 0 \\ \mathbf{0} \\ \mathbf{0} \\ \mathbf{0} \\ (f_{i,j})_{f \in Q_{\text{sk}}} \end{pmatrix},$$

592 where  $\mathbf{M}_{n+2}$  is the  $n + 2$ 'th row of  $\mathbf{M}$ .

593 Putting everything together, can write

$$\begin{pmatrix} 0 \\ \mathbf{0} \\ 0 \\ D\vec{x}^{(b)} - \Gamma C\vec{S} \\ -B\vec{x}^{(b)} + \Gamma A\vec{S} \end{pmatrix}^\top \mathbf{M} \begin{pmatrix} 0 \\ \mathbf{0} \\ A\vec{y}^{(b)} - B\vec{T} \\ C\vec{y}^{(b)} - D\vec{T} \\ \mathbf{0} \end{pmatrix}$$

594 as

$$\begin{aligned}
& (AD - BC)\mathbf{M}_{n+2} \begin{pmatrix} 0 \\ \mathbf{0} \\ \mathbf{0} \\ \mathbf{0} \\ (f(\vec{x}^{(b)}, \vec{y}^{(b)}) - \Gamma f(\vec{s}, \vec{t}))_{f \in Q_{\text{sk}}} \end{pmatrix} \\
&= (AD - BC)\mathbf{M}_{n+2} \begin{pmatrix} 0 \\ \mathbf{0} \\ \mathbf{0} \\ \mathbf{0} \\ (f(\vec{x}^{(1-b)}, \vec{y}^{(1-b)}) - \Gamma f(\vec{s}, \vec{t}))_{f \in Q_{\text{sk}}} \end{pmatrix} \\
&= \begin{pmatrix} 0 \\ \mathbf{0} \\ 0 \\ D\vec{x}^{(1-b)} - \Gamma C\vec{S} \\ -B\vec{x}^{(1-b)} + \Gamma A\vec{S} \end{pmatrix}^\top \mathbf{M} \begin{pmatrix} 0 \\ \mathbf{0} \\ A\vec{y}^{(b)} - B\vec{T} \\ C\vec{y}^{(b)} - D\vec{T} \\ \mathbf{0} \end{pmatrix} \tag{3}
\end{aligned}$$



595 where we use the fact that for all  $f \in Q_{sk}$ , we have the equality  $f(\vec{x}^{(b)}, \vec{y}^{(b)}) = f(\vec{x}^{(1-b)}, \vec{y}^{(1-b)})$ .

596 Evaluating equation  $\text{Eq}_b(\mathbf{M})$  on  $A = B = D = 0$  (by **Rule 2**), then using **Rule 1** on  $\Gamma S_i C$  for all  
 597  $i \in [n]$ , and using (1) and (3), we obtain that the coefficient  $M_{n+2+i,1} = 0$  for all  $i \in [n]$ . Evaluating  
 598  $\text{Eq}_b(\mathbf{M})$  on  $B = C = D = 0$  (by **Rule 2**), then using **Rule 1** on  $\Gamma S_i A$  for all  $i \in [n]$ , and using (1)  
 599 and (3), we obtain that the coefficient  $M_{2n+2+i,1} = 0$  for all  $i \in [n]$ . Thus, we have:

$$\forall \beta \in \{0, 1\} : \begin{pmatrix} 0 \\ \mathbf{0} \\ 0 \\ D\vec{x}^{(\beta)} - \Gamma C\vec{S} \\ -B\vec{x}^{(\beta)} + \Gamma A\vec{S} \end{pmatrix}^\top \mathbf{M} \begin{pmatrix} 1 \\ \mathbf{0} \\ \mathbf{0} \\ \mathbf{0} \\ \mathbf{0} \end{pmatrix} = 0. \quad (4)$$

600 Evaluating equation  $\text{Eq}_b(\mathbf{M})$  on  $A = C = D = 0$  (by **Rule 2**), then using **Rule 1** on  $BT_j$  for all  
 601  $i \in [n]$ , and using (3), we obtain that the coefficient  $M_{1,n+1+j} = 0$  for all  $j \in [n]$ . Evaluating  
 602  $\text{Eq}_b(\mathbf{M})$  on  $A = B = C = 0$  (by **Rule 2**), then using **Rule 1** on  $DT_j$  for all  $j \in [n]$ , and using (3),  
 603 we obtain that the coefficient  $M_{1,2n+1+j} = 0$  for all  $j \in [n]$ . Thus, we have:

$$\forall \beta \in \{0, 1\} : \begin{pmatrix} 1 \\ \mathbf{0} \\ 0 \\ \mathbf{0} \\ \mathbf{0} \end{pmatrix}^\top \mathbf{M} \begin{pmatrix} 0 \\ \mathbf{0} \\ A\vec{y}^{(\beta)} - B\vec{T} \\ C\vec{y}^{(\beta)} - D\vec{T} \\ \mathbf{0} \end{pmatrix} = 0. \quad (5)$$

604 Overall, we have:

$$\text{Eq}_b(\mathbf{M}) : \begin{pmatrix} 1 \\ (AD - BC)\vec{S} \\ (AD - BC)\Gamma \\ D\vec{x}^{(b)} - \Gamma C\vec{S} \\ -B\vec{x}^{(b)} + \Gamma A\vec{S} \end{pmatrix}^\top \mathbf{M} \begin{pmatrix} 1 \\ \vec{T} \\ A\vec{y}^{(b)} - B\vec{T} \\ C\vec{y}^{(b)} - D\vec{T} \\ (f(\vec{S}, \vec{T}))_{f \in Q_{sk}} \end{pmatrix} = 0$$

605 which implies the following relation, under (1),(2),(4),(5)

$$\begin{aligned} & \begin{pmatrix} 1 \\ (AD - BC)\vec{S} \\ (AD - BC)\Gamma \\ \mathbf{0} \\ \mathbf{0} \end{pmatrix}^\top \mathbf{M} \begin{pmatrix} 1 \\ \vec{T} \\ \mathbf{0} \\ \mathbf{0} \\ (f(\vec{S}, \vec{T}))_{f \in Q_{sk}} \end{pmatrix} \\ & + \begin{pmatrix} 0 \\ \mathbf{0} \\ 0 \\ D\vec{x}^{(b)} - \Gamma C\vec{S} \\ -B\vec{x}^{(b)} + \Gamma A\vec{S} \end{pmatrix}^\top \mathbf{M} \begin{pmatrix} 0 \\ \mathbf{0} \\ A\vec{y}^{(b)} - B\vec{T} \\ C\vec{y}^{(b)} - D\vec{T} \\ \mathbf{0} \end{pmatrix} = 0 \end{aligned}$$

606 and then, under (3)

$$\begin{aligned} & \begin{pmatrix} 1 \\ (AD - BC)\vec{S} \\ (AD - BC)\Gamma \\ \mathbf{0} \\ \mathbf{0} \end{pmatrix}^\top \mathbf{M} \begin{pmatrix} 1 \\ \vec{T} \\ \mathbf{0} \\ \mathbf{0} \\ (f(\vec{S}, \vec{T}))_{f \in Q_{sk}} \end{pmatrix} \\ & + \begin{pmatrix} 0 \\ \mathbf{0} \\ 0 \\ D\vec{x}^{(1-b)} - \Gamma C\vec{S} \\ -B\vec{x}^{(1-b)} + \Gamma A\vec{S} \end{pmatrix}^\top \mathbf{M} \begin{pmatrix} 0 \\ \mathbf{0} \\ A\vec{y}^{(1-b)} - B\vec{T} \\ C\vec{y}^{(1-b)} - D\vec{T} \\ \mathbf{0} \end{pmatrix} = 0. \end{aligned}$$

607 Under (1),(2),(4),(5), this implies

$$\text{Eq}_{1-b}(\mathbf{M}) : \begin{pmatrix} 1 \\ (AD - BC)\vec{S} \\ (AD - BC)\Gamma \\ D\vec{x}^{(1-b)} - \Gamma C\vec{S} \\ -B\vec{x}^{(1-b)} + \Gamma A\vec{S} \end{pmatrix}^{\top} \mathbf{M} \begin{pmatrix} 1 \\ \vec{T} \\ A\vec{y}^{(1-b)} - B\vec{T} \\ C\vec{y}^{(1-b)} - D\vec{T} \\ (f(\vec{S}, \vec{T}))_{f \in Q_{\text{sk}}} \end{pmatrix} = 0$$

608

□
